# Supplementary material
Source: publisher figshare collection journal article supplement (https://geolsoc.figshare.com/ndownloader/files/30895467)
Supplement: Supplementary file 1 [file 30895467]

**Fig. S2**

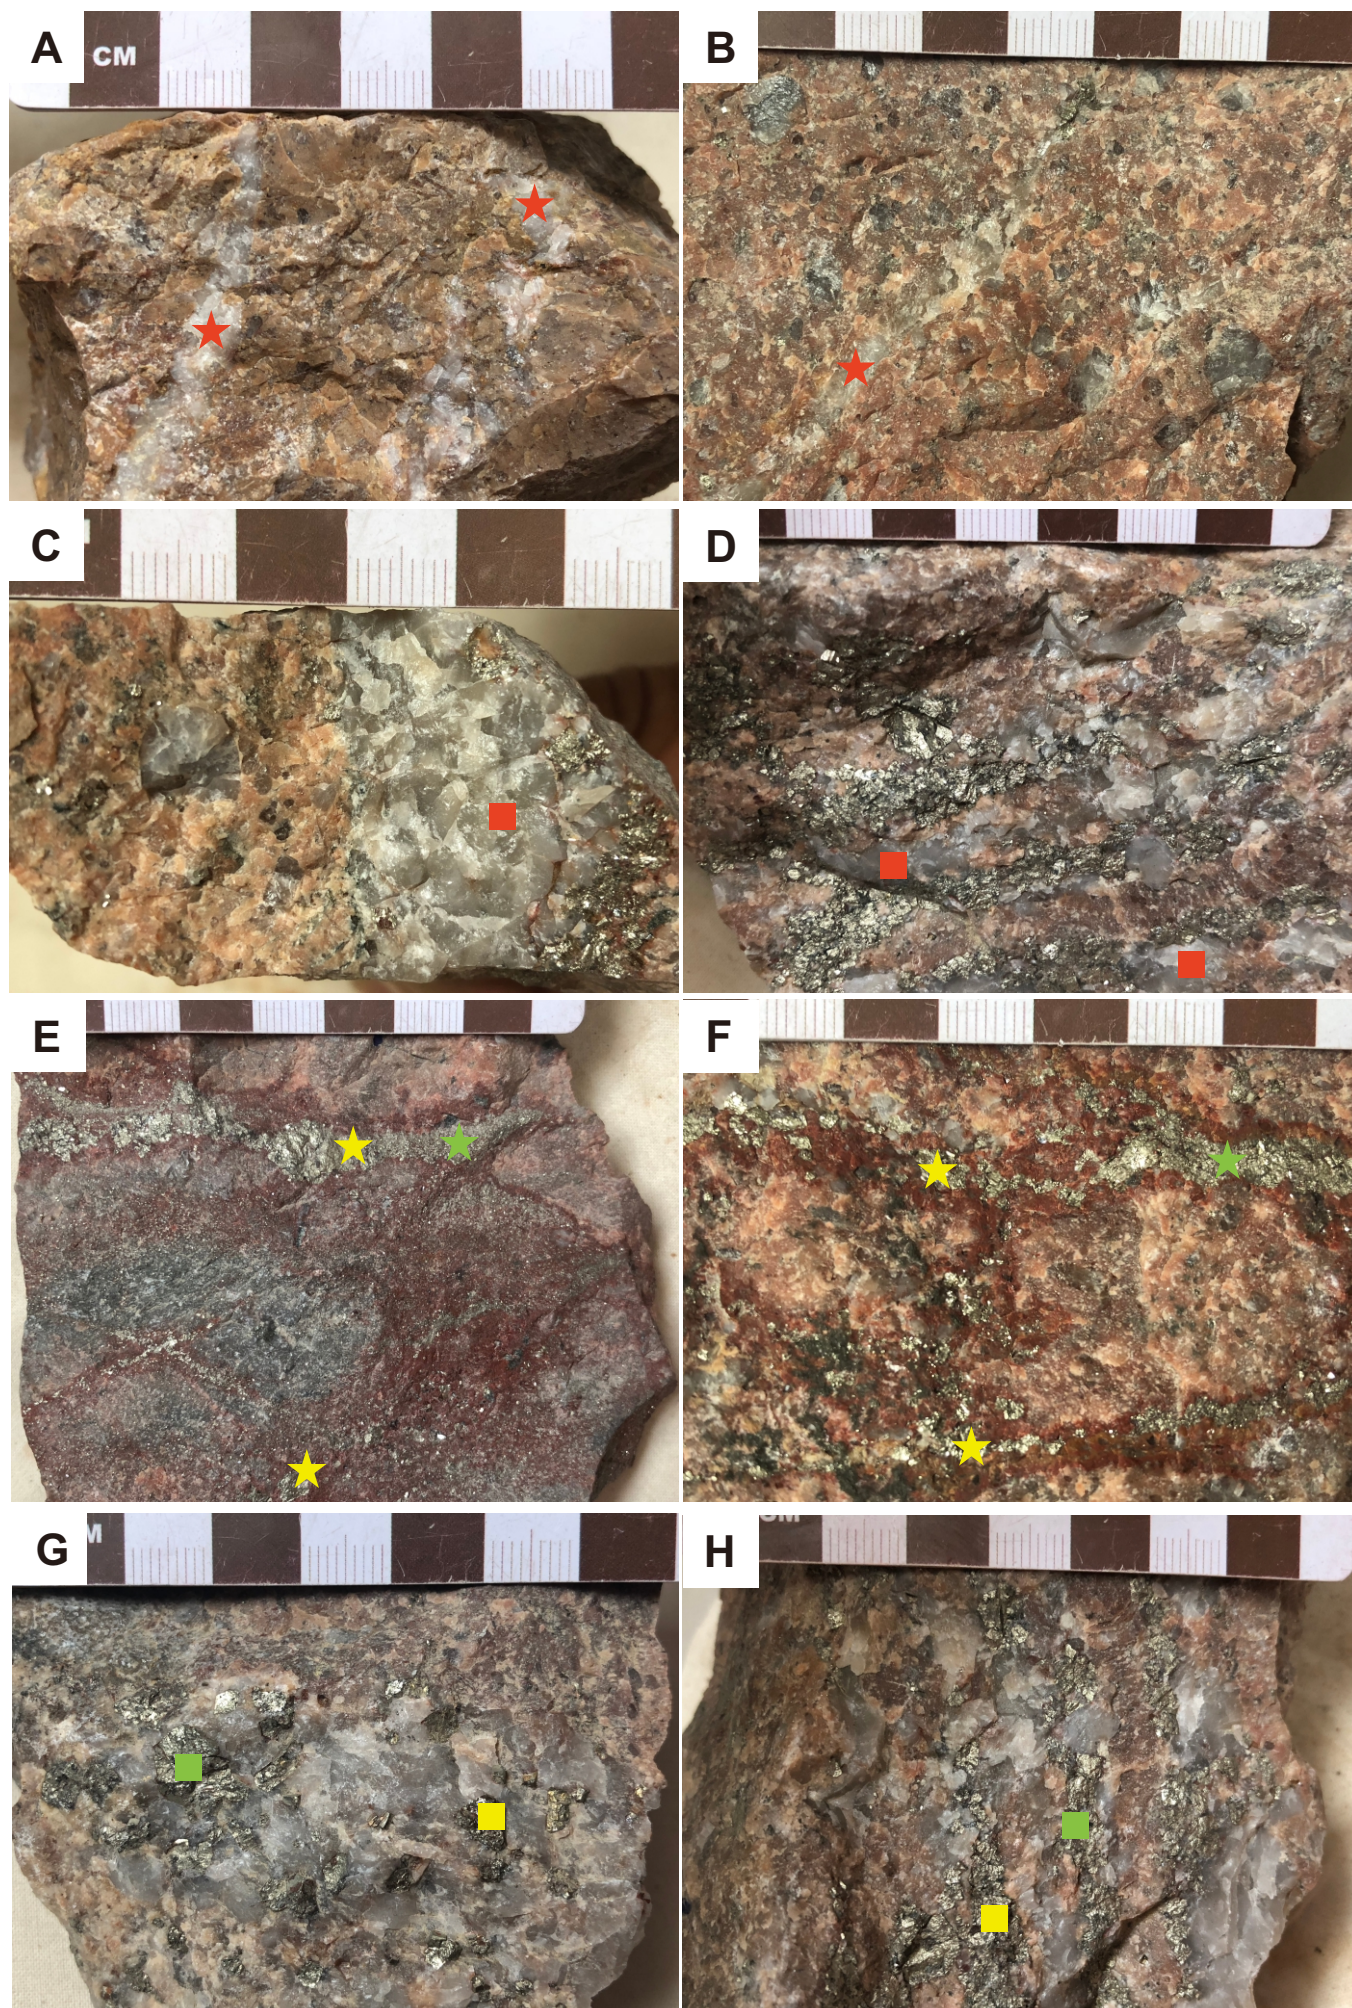

|                  |                       |             |                 |
|------------------|-----------------------|-------------|-----------------|
| Porphyry episode | ★ Fls and H-O isotope | ★ S isotope | ★ Re-Os isotope |
| Orogenic episode | ■ Fls and H-O isotope | ■ S isotope | ■ Re-Os isotope |
